# Supplementary material for: Oscillatory Cortical Activity in an Animal Model of Dystonia Caused by Cerebellar Dysfunction
Source: Front Cell Neurosci. 2018 Nov 6;12:390. doi: 10.3389/fncel.2018.00390 (PMC6232371; doi:10.3389/fncel.2018.00390)
Supplement: Supplementary file 1 [file Data_Sheet_1.docx]

***Supplementary Material***

**Oscillatory cortical activity in an animal model of dystonia caused by cerebellar dysfunction**

**Elena Laura Georgescu1,2,#, Ioana Antoaneta Georgescu1,#, Carmen Denise Mihaela Zahiu1, Alexandru Răzvan Șteopoaie1, Vlad- Petru Morozan1, Adrian Ștefan Pană1, Ana-Maria Zăgrean1,* and Daniela Popa1, 2,***

1Division of Physiology and Neuroscience, Carol Davila University of Medicine and Pharmacy, Bucharest, Romania

2Institut de biologie de l'Ecole normale supérieure (IBENS), Ecole normale supérieure, CNRS, INSERM, PSL Research University, 75005 Paris, France

# These authors contributed equally to this work.

*These authors jointly directed this work.

*** Correspondence should be addressed to D.P (daniela.popa@ens.fr) or A.M.Z (ana-maria.zagrean@umfcd.ro)**

# Supplementary Figures

## Supplementary Figure 1:

**Supplementary Figure 2:**

**Supplementary Figure 3:**

**Supplementary Figure 4:**

**Supplementary Figure 5:**

**Supplementary Figure 6:**

**Supplementary Figure 1.** Imaginary motor-somatosensory and motor-parietal coherences during day 5 of dystonia (pre and post kainate). **(A)** Imaginary motor-somatosensory coherence for each frequency band (represented as percentage from baseline day), baseline vs day 5 (pre and post). **(B)** Imaginary motor-parietal coherence for each frequency band (represented as percentage from baseline day), baseline vs day 5 (pre and post). **(C)** Imaginary motor-somatosensory coherence across all frequencies (0,5-100 Hz), baseline vs day 5 (pre and post). **(D)** Imaginary motor-parietal coherence across all frequencies (0,5-100 Hz), baseline vs day 5 (pre and post) of intracerebellar kainic acid administration.

**Supplementary Figure 2.** Correlations between motor cortex power spectral density and behavior on day 1. **(A)** Linear regression of dystonic behavior versus motor cortex (delta, theta, beta, low gamma, high gamma) power spectral density. **(B, C)** Linear regression of AW% - pre **(B)** and post **(C)** kainic acid administration versus motor cortex (delta, theta, beta, low gamma, high gamma) power spectral density. Each point corresponds to one animal (n = 20). The plain and dotted curves correspond to the 95% tolerance and confidence bands of the linear regression, respectively.

**Supplementary Figure 3.** Correlations between somatosensory cortex power spectral density and behavior on day 1. **(A)** Linear regression of dystonic behavior versus somatosensory cortex (delta, theta, beta, low gamma, high gamma) power spectral density. **(B, C)** Linear regression of AW% - pre **(B)** and post **(C)** kainic acid administration versus somatosensory cortex (delta, theta, beta, low gamma, high gamma) power spectral density. Each point corresponds to one animal (n = 10). The plain and dotted curves correspond to the 95% tolerance and confidence bands of the linear regression, respectively.

**Supplementary Figure 4.** Correlations between parietal cortex power spectral density and behavior on day 1. **(A)** Linear regression of dystonic behavior versus parietal cortex (delta, theta, beta, low gamma, high gamma) power spectral density. **(B, C)** Linear regression of AW% – pre **(B)** and post **(C)** kainic acid administration versus parietal cortex (delta, theta, beta, low gamma, high gamma) power spectral density. Each point corresponds to one animal (n = 10). The plain and dotted curves correspond to the 95% tolerance and confidence bands of the linear regression, respectively.

**Supplementary Figure 5.** Correlations between motor-somatosensory coherence and behavior on day 1. **(A)** Linear regression of dystonic behavior versus motor-somatosensory coherence (delta, theta, beta, low gamma, high gamma). **(B, C)** Linear regression of AW% – pre **(B)** and post **(C)** kainic acid administration versus motor-somatosensory coherence (delta, theta, beta, low gamma, high gamma). Each point corresponds to one animal (n = 10). The plain and dotted curves correspond to the 95% tolerance and confidence bands of the linear regression, respectively.

**Supplementary Figure 6.** Correlations between motor-parietal coherence and behavior on day 1. **(A)** Linear regression of dystonic behavior versus motor-parietal coherence (delta, theta, beta, low gamma, high gamma). **(B, C)** Linear regression of AW% - pre **(B)** and post **(C)** kainic acid administration versus motor-parietal coherence (delta, theta, beta, low gamma, high gamma). Each point corresponds to one animal (n = 10). The plain and dotted curves correspond to the 95% tolerance and confidence bands of the linear regression, respectively.

# Supplementary Tables

**Supplementary Table 1**. Pearson correlation coefficients (r) and significance (P) values for linear regressions between motor cortex power spectral density and AW% before (pre) and after (post) kainic acid administration, *p < 0.05, ** p < 0.01, *** p < 0.001:

| Frequency band | Day 1 Pre | Day 1 Post | Day 2 Pre | Day 2 Post | Day 3 Pre | Day 3 Post | Day 4 Pre | Day 4 Post | Day 5 Pre | Day 5 Post |
| --- | --- | --- | --- | --- | --- | --- | --- | --- | --- | --- |
| delta | r =0.2993  P =0.2275 | r =0.2465  P =0.2947 | r =0.002414  P =0.9924 | r =0.2116  P =0.3845 | r =0.4271  P =0.1123 | r =-0.09952  P =0.7350 | r =0.2810  P =0.3762 | r =0.7479  P =0.0021** | r =0.5197  P =0.0568 | r =0.5109  P =0.1083 |
| theta | r =0.1024  P =0.6859 | r =0.1162  P =0.6257 | r =0.2683  P =0.2818 | r =0.1279  P =0.6019 | r =0.2310  P =0.4075 | r =-0.1983  P =0.4968 | r =0.01507  P =0.9629 | r =0.4439  P =0.1118 | r =0.5107  P =0.0620 | r =0.3858  P =0.2412 |
| beta | r=0.003306  P =0.9896 | r =0.04266  P =0.8583 | r =0.1330  P =0.5988 | r =-0.06094  P =0.8043 | r =-0.08167  P =0.7723 | r =-0.3368  P =0.2390 | r =-0.1513  P =0.6389 | r =0.2312  P =0.4265 | r =0.1746  P =0.5505 | r=0.08045  P =0.8141 |
| low gamma | r =-0.1167  P =0.6446 | r =-0.02011  P =0.9329 | r =0.09857  P =0.6972 | r =-0.1214  P =0.6205 | r =0.1234  P =0.6612 | r =-0.1533  P =0.6008 | r =-0.2810  P =0.3762 | r =0.1050  P =0.7209 | r =-0.03802  P =0.8973 | r =0.05094  P =0.8818 |
| high gamma | r =-0.1469  P =0.5607 | r =0.07482  P =0.7539 | r =0.2318  P =0.3546 | r =0.1374  P =0.5747 | r =0.2341  P =0.4011 | r =0.2261  P =0.4370 | r =-0.04357  P =0.8930 | r =0.2727  P =0.3456 | r =0.09397  P =0.7493 | r =0.2051  P =0.5452 |

**Supplementary Table 2.** Pearson correlation coefficients (r) and significance (P) values for linear regressions between motor cortex power spectral density in different frequency bands and dystonia score, post kainic acid administration:

| Frequency band | Day 1 Post | Day 2 Post | Day 3 Post | Day 4 Post | Day 5 Post |
| --- | --- | --- | --- | --- | --- |
| delta | r = -0.1103  P = 0.6435 | r =0.2961  P =0.2184 | r =0.2968  P =0.3028 | r =-0.3015  P =0.2949 | r =-0.1881  P =0.5583 |
| theta | r =-0.1469  P =0.5364 | r =0.2591  P =0.2842 | r =0.3413  P =0.2323 | r =-0.07213  P =0.8064 | r =0.02389  P =0.9412 |
| beta | r =-0.2040  P =0.3883 | r =0.2099  P =0.3885 | r =0.3404  P =0.2336 | r =-0.05723  P =0.8459 | r =0.1360  P =0.6734 |
| low gamma | r =-0.3567  P =0.1227 | r =0.1321  P =0.5899 | r =0.1767  P =0.5456 | r =-0.2623  P =0.3649 | r =0.1314  P =0.6840 |
| high gamma | r =-0.5093  P =0.0218* | r =-0.1148  P =0.6397 | r =-0.2500  P =0.3887 | r =-0.5366  P =0.0479* | r =0.02241  P =0.9449 |

**Supplementary Table 3.** Pearson correlation coefficients (r) and significance (P) values for linear regressions between somatosensory cortex power spectral density and AW% before (pre) and after (post) kainic acid administration, *p < 0.05, ** p < 0.01, *** p < 0.001:

| Frequency band | Day 1 Pre | Day 1 Post | Day 2 Pre | Day 2 Post | Day 3 Pre | Day 3 Post | Day 4 Pre | Day 4 Post | Day 5 Pre | Day 5 Post |
| --- | --- | --- | --- | --- | --- | --- | --- | --- | --- | --- |
| delta | r =0.3510  P =0.4402 | r =0.1632  P =0.6748 | r =0.7781  P =0.0684 | r =0.4150  P =0.2667 | r =0.7860  P =0.0361* | r =0.3144  P =0.4922 | r =0.3074  P =0.6149 | r =0.8060  P =0.0286* | r =0.8532  P =0.0146* | r =0.8498  P =0.3535 |
| theta | r =0.1411  P =0.7629 | r =0.06866  P =0.8607 | r =0.6798  P =0.1374 | r =0.1619  P =0.6772 | r =0.5785  P =0.1736 | r =0.5502  P =0.2007 | r =0.3485  P =0.5654 | r =0.4525  P =0.3079 | r =0.6074  P =0.1480 | r =0.01350  P =0.9914 |
| beta | r =0.3390  P =0.4570 | r =0.1781  P =0.6466 | r =0.7758  P =0.0698 | r =0.3400  P =0.3707 | r =0.6754  P =0.0959 | r =0.7404  P =0.0570 | r =0.3673  P =0.5431 | r =0.7051  P =0.0768 | r =0.5995  P =0.1548 | r =0.1919  P =0.8771 |
| low gamma | r =0.3232  P =0.4795 | r =0.2961  P =0.4392 | r =0.6725  P =0.1434 | r =0.6052  P =0.0842 | r =0.7119  P =0.0727 | r =0.6805  P =0.0925 | r =0.2597  P =0.6731 | r =0.5472  P =0.2036 | r =0.4559  P =0.3038 | r =0.3832  P =0.7496 |
| high gamma | r =0.4115  P =0.3590 | r =0.2861  P =0.4554 | r =0.7578  P =0.0809 | r =0.6525  P =0.0568 | r =0.6907  P =0.0857 | r =0.4992  P =0.2541 | r =0.2848  P =0.6424 | r =0.5274  P =0.2238 | r =0.6154  P =0.1413 | r =0.4607  P =0.6952 |

**Supplementary Table 4.** Pearson correlation coefficients (r) and significance (P) values for linear regressions between somatosensory cortex power spectral density in different frequency bands and dystonia score, post kainic acid administration:

| Frequency band | Day 1 Post | Day 2 Post | Day 3 Post | Day 4 Post | Day 5 Post |
| --- | --- | --- | --- | --- | --- |
| delta | r =-0.2192  P =0.5710 | r =-0.4167  P =0.3044 | r =-0.7398  P =0.0573 | r =-0.5045  P =0.2482 | r =-0.1178  P =0.8241 |
| theta | r =-0.2713  P =0.4801 | r =-0.5816  P =0.1305 | r =-0.6549  P =0.1104 | r =-0.4567  P =0.3030 | r =0.07185  P =0.8924 |
| beta | r =-0.3371  P =0.3751 | r =-0.6494  P =0.0814 | r =-0.7732  P =0.0414* | r =-0.6720  P =0.0982 | r =0.07073  P =0.8941 |
| low gamma | r =-0.3975  P =0.2893 | r =-0.5931  P =0.1212 | r =-0.7628  P =0.0461* | r =-0.8226  P =0.0231* | r =-0.07961  P =0.8808 |
| high gamma | r =-0.3848  P =0.3065 | r =-0.6105  P =0.1079 | r =-0.6912  P =0.0855 | r =-0.8673  P =0.0115* | r =-0.07878  P =0.8821 |

**Supplementary Table 5.** Pearson correlation coefficients (r) and significance (P) values for linear regressions between parietal cortex power spectral density and AW% before (pre) and after (post) kainic acid administration, *p < 0.05, ** p < 0.01, *** p < 0.001:

| Frequency band | Day 1 Pre | Day 1 Post | Day 2 Pre | Day 2 Post | Day 3 Pre | Day 3 Post | Day 4 Pre | Day 4 Post | Day 5 Pre | Day 5 Post |
| --- | --- | --- | --- | --- | --- | --- | --- | --- | --- | --- |
| delta | r =0.1857  P =0.6075 | r =0.7150  P =0.0201* | r =0.3093  P =0.4559 | r =0.1802  P =0.6427 | r =-0.02652  P =0.9503 | r =-0.3539  P =0.4913 | r =-0.5007  P =0.3117 | r =0.4875  P =0.2671 | r =-0.01143  P =0.9806 | r =0.6897  P =0.0864 |
| theta | r =0.3104  P =0.3828 | r =0.3036  P =0.3938 | r =-0.3688  P =0.3686 | r =0.09026  P =0.8174 | r =0.3563  P =0.3863 | r =-0.3991  P =0.4332 | r =-0.2317  P =0.6586 | r =0.1855  P =0.6904 | r =0.1227  P =0.7933 | r =0.08273  P =0.8600 |
| beta | r =0.1874  P =0.6042 | r =0.4560  P =0.1853 | r =-0.3156  P =0.4464 | r =0.1179  P =0.7626 | r =0.07205  P =0.8654 | r =-0.4902  P =0.3236 | r =-0.06726  P =0.8993 | r =0.1387  P =0.7668 | r =-0.1340  P =0.7745 | r =-0.08120  P =0.8626 |
| low gamma | r =0.1451  P =0.6891 | r =0.007926  P =0.9827 | r =-0.2768  P =0.5069 | r =0.05622  P =0.8858 | r =0.2692  P =0.5192 | r =-0.3563  P =0.4881 | r =-0.1513  P =0.7748 | r =0.2731  P =0.5534 | r =0.04603  P =0.9219 | r =0.09267  P =0.8434 |
| high gamma | r =0.4205  P =0.2263 | r =-0.1202  P =0.7409 | r =0.03699  P =0.9307 | r =0.007358  P =0.9850 | r =0.3025  P =0.4664 | r =-0.007638  P =0.9885 | r =-0.009019  P =0.9865 | r =0.3146  P =0.4920 | r=0.007879  P =0.9866 | r =0.2608  P =0.5721 |

**Supplementary Table 6.** Pearson correlation coefficients (r) and significance (P) values for linear regressions between parietal cortex power spectral density in different frequency bands and dystonia score, post kainic acid administration:

| Frequency band | Day 1 Post | Day 2 Post | Day 3 Post | Day 4 Post | Day 5 Post |
| --- | --- | --- | --- | --- | --- |
| delta | r =0.004690  P =0.9897 | r =0.4101  P =0.2729 | r =0.9829  P =0.0004*** | r =0.6046  P =0.1504 | r =0.07799  P =0.8680 |
| theta | r =-0.2972  P =0.4043 | r =0.3668  P =0.3315 | r =0.3190  P =0.5378 | r =0.3893  P =0.3880 | r =0.4981  P =0.2553 |
| beta | r =-0.4610  P =0.1800 | r =0.1993  P =0.6072 | r =0.4058  P =0.4247 | r =0.5841  P =0.1685 | r =0.4616  P =0.2971 |
| low gamma | r =-0.03547  P =0.9225 | r =0.1314  P =0.7361 | r =0.4678  P =0.3495 | r =0.4927  P =0.2612 | r =0.5942  P =0.1595 |
| high gamma | r =0.1638  P =0.6512 | r =-0.09827  P =0.8014 | r =0.4560  P =0.3634 | r =0.07291  P =0.8765 | r =0.6398  P =0.1217 |

**Supplementary Table 7**. Pearson correlation coefficients (r) and significance (P) values for linear regressions between motor-somatosensory coherence and AW% before (pre) and after (post) kainic acid administration, *p < 0.05, ** p < 0.01, *** p < 0.001:

| Frequency band | Day 1 Pre | Day 1 Post | Day 2 Pre | Day 2 Post | Day 3 Pre | Day 3 Post | Day 4 Pre | Day 4 Post | Day 5 Pre | Day 5 Post |
| --- | --- | --- | --- | --- | --- | --- | --- | --- | --- | --- |
| delta | r = 0.4874  P = 0.2206 | r = -0.6884  P = 0.0277 * | r = -0.6542  P = 0.0559 | r = -0.7777  P = 0.0231 * | r = -0.3828  P = 0.3967 | r = -0.3010  P = 0.4312 | r = -0.2608  P = 0.5722 | r = -0.5541  P = 0.1542 | r = -0.5166  P = 0.2351 | r = -0.9324  P = 0.0676 |
| theta | r = 0.5139  P = 0.1927 | r = -0.6773  P = 0.0314 * | r = -0.3676  P = 0.3304 | r = -0.7544  P = 0.0306 * | r = 0.09419  P = 0.8408 | r = -0.6243  P = 0.0723 | r = -0.1097  P = 0.8149 | r = -0.4656  P = 0.2449 | r = -0.1095  P = 0.8152 | r = -0.5487  P = 0.4513 |
| beta | r = 0.4908  P = 0.2169 | r = -0.5177  P = 0.1254 | r = -0.5855  P = 0.0976 | r = -0.7645  P = 0.0271 * | r = -0.1739  P = 0.7092 | r = -0.5803  P = 0.1014 | r = -0.3268  P = 0.4743 | r = -0.5386  P = 0.1684 | r = -0.3935  P = 0.3824 | r = -0.7883  P = 0.2117 |
| low gamma | r = 0.5167  P = 0.1898 | r = -0.3788  P = 0.2804 | r = -0.5588  P = 0.1178 | r = -0.7286  P = 0.0404 * | r = -0.09325  P = 0.8424 | r = -0.4998  P = 0.1707 | r = -0.6230  P = 0.1351 | r = -0.6302  P = 0.0940 | r = -0.6166  P = 0.1403 | r = -0.8520  P = 0.1480 |
| high gamma | r = 0.7005  P = 0.0530 | r = -0.3985  P = 0.2540 | r = -0.1996  P = 0.6066 | r = -0.5637  P = 0.1456 | r = 0.3163  P = 0.4895 | r = -0.4568  P = 0.2164 | r = -0.5234  P = 0.2280 | r = -0.5652  P = 0.1443 | r = -0.3598  P = 0.4279 | r = -0.5012  P = 0.4988 |

**Supplementary Table 8.** Pearson correlation coefficients (r) and significance (P) values for linear regressions between motor-somatosensory coherence in different frequency bands and dystonia score, post kainic acid administration:

| Frequency band | Day 1 Post | Day 2 Post | Day 3 Post | Day 4 Post | Day 5 Post |
| --- | --- | --- | --- | --- | --- |
| delta | r = 0.07503  P = 0.8368 | r = 0.6420  P = 0.0861 | r = 0.3465  P = 0.3610 | r = 0.6023  P = 0.1141 | r = 0.2131  P = 0.6853 |
| theta | r = 0.2735  P = 0.4445 | r = 0.5260  P = 0.1806 | r = 0.03721  P = 0.9243 | r = 0.4841  P = 0.2242 | r = -0.3621  P = 0.4805 |
| beta | r = 0.1838  P = 0.6113 | r = 0.6399  P = 0.0875 | r = -0.02778  P = 0.9434 | r = 0.4628  P = 0.2482 | r = -0.3901  P = 0.4445 |
| low gamma | r = 0.06834  P = 0.8512 | r = 0.6197  P = 0.1013 | r = 0.05091  P = 0.8965 | r = 0.4071  P = 0.3168 | r = -0.1981  P = 0.7067 |
| high gamma | r = -0.002965  P = 0.9935 | r = 0.3910  P = 0.3381 | r = 0.04103  P = 0.9165 | r = 0.3286  P = 0.4268 | r = -0.1369  P = 0.7960 |

**Supplementary Table 9.** Pearson correlation coefficients (r) and significance (P) values for linear regressions between motor-parietal coherence and AW% before (pre) and after (post) kainic acid administration, *p < 0.05, ** p < 0.01, *** p < 0.001:

| Frequency band | Day 1 Pre | Day 1 Post | Day 2 Pre | Day 2 Post | Day 3 Pre | Day 3 Post | Day 4 Pre | Day 4 Post | Day 5 Pre | Day 5 Post |
| --- | --- | --- | --- | --- | --- | --- | --- | --- | --- | --- |
| delta | r =-0.06028  P =0.8686 | r =-0.05009  P =0.8907 | r =-0.3873  P =0.3031 | r =-0.3425  P =0.3669 | r =-0.2807  P =0.5420 | r =-0.02422  P =0.9589 | r =-0.6136  P =0.1428 | r =0.03912  P =0.9267 | r =-0.1754  P =0.6778 | r =0.3251  P =0.4321 |
| theta | r =0.1391  P =0.7015 | r =-0.2397  P =0.5047 | r =-0.4339  P =0.2433 | r =-0.5571  P =0.1192 | r =0.1583  P =0.7346 | r =0.2819  P =0.5402 | r =-0.1902  P =0.6830 | r =-0.03828  P =0.9283 | r =-0.01645  P =0.9692 | r =0.2791  P =0.5033 |
| beta | r =0.1811  P =0.6165 | r =0.07556  P =0.8357 | r =-0.3738  P =0.3217 | r =-0.4894  P =0.1812 | r =0.3354  P =0.4621 | r =0.4194  P =0.3489 | r =0.05309  P =0.9100 | r =0.06304  P =0.8821 | r =0.04449  P =0.9167 | r =0.3055  P =0.4619 |
| low gamma | r =0.2149  P =0.5509 | r =0.03615  P =0.9210 | r =-0.3160  P =0.4074 | r =-0.5186  P =0.1526 | r =0.4465  P =0.3152 | r =0.2892  P =0.5293 | r =-0.05435  P =0.9079 | r =0.1587  P =0.7074 | r =0.2020  P =0.6315 | r =0.4336  P =0.2831 |
| high gamma | r =0.2646  P =0.4601 | r =-0.1499  P =0.6795 | r =-0.3903  P =0.2991 | r =-0.5341  P =0.1386 | r =0.3086  P =0.5007 | r =0.1066  P =0.8200 | r =-0.07857  P =0.8670 | r =-0.08705  P =0.8376 | r =-0.07712  P =0.8560 | r =0.09966  P =0.8144 |

**Supplementary Table 10.** Pearson correlation coefficients (r) and significance (P) values for linear regressions between motor-parietal coherence in different frequency bands and dystonia score, post kainic acid administration:

| Frequency band | Day 1 Post | Day 2 Post | Day 3 Post | Day 4 Post | Day 5 Post |
| --- | --- | --- | --- | --- | --- |
| delta | r =-0.5595  P =0.0926 | r =0.7036  P =0.0344* | r =0.2518  P =0.5859 | r =0.1470  P =0.7283 | r =0.04318  P =0.9191 |
| theta | r =-0.4626  P =0.1783 | r =0.2672  P =0.4871 | r =-0.4367  P =0.3273 | r =0.2140  P =0.6108 | r =0.2492  P =0.5518 |
| beta | r =-0.5806  P =0.0784 | r =0.3379  P =0.3739 | r =-0.2719  P =0.5552 | r =0.1773  P =0.6745 | r =0.05442  P =0.8982 |
| low gamma | r =-0.5701  P =0.0853 | r =0.3032  P =0.4278 | r =-0.1614  P =0.7296 | r =0.1525  P =0.7185 | r =0.01571  P =0.9706 |
| high gamma | r =-0.5551  P =0.0958 | r =0.3522  P =0.3526 | r =-0.4653  P =0.2928 | r =0.09464  P =0.8236 | r =0.1925  P =0.6478 |
